# Supplementary material for: Survival implications of non-organized breast cancer screening in a Brazilian tertiary women’s health center: A retrospective cohort study of 1517 patients
Source: Research Square preprint supplement (doi:10.21203/rs.3.rs-8701531/v1), 2026-02-12
Supplement: Supplementary file 1 [file 7578d1e7d8a6b455de16d67f.docx]

Supplementary Table S1. Univariate and multivariable analysis of relevant clinicopathologic characteristics of Disease-free survival (n=1517)

| **Univariate Multivariate** | | | | | | |
| --- | --- | --- | --- | --- | --- | --- |
| **Variable** | **Categories** | ***p* value** | **HR (CI 95%)** | **Categories** | ***p* value** | **HR (CI 95%)** |
| Age (yr) | Continue variable | 0.031 | 0.99 (0.98 – 0.99) | Continue variable | 0.181 | 0.99 (0.98 – 1.00) |
| Comorbidities | No (ref.)  Yes | ---  0.049 | 1.00  0.81 (0.66 – 0.99) | No (ref.)  Yes | ---  0.099 | 1.00  0.82 (0.65 – 1.04) |
| Detection method | Screening (ref.)  Symptoms | ---  <0.001 | 1.00  1.93 (1.48 – 2.51) | Screening (ref.)  Symptoms | ---  0.351 | 1.00  1.15 (0.86 – 1.53) |
| Surgical intervention | BCS (ref.)  OBCS  TM  IBRM | ---  0.002  <0.001  0.945 | 1.00  1.82 (1.25 – 2.66)  2.03 (1.59 – 2.58)  1.01 (0.73 – 1.39) | BCS (ref.)  OBCS  TM  IBRM | ---  0.051  0.620  0.052 | 1.00  1.50 (0.98 – 2.23)  0.93 (0.69 – 1.25)  0.59 (0.42 – 1.04) |
| Subtype | Luminal A/B (ref.)  Luminal B/HER2+  Non luminal HER2+  Triple negative | ---  0.004  <0.001  <0.001 | 1.00  1.58 (1.15 – 2.17)  1.90 (1.31 – 2.74)  2.94 (1.94 – 3.19) | Luminal A/B (ref.)  Luminal B/HER2+  Non luminal HER2+  Triple negative | ---  0.005  0.040  <0.001 | 1.00  1.59 (1.15 – 2.20)  1.53 (1.02 – 2.28)  2.98 (2.21 – 4.03) |
| Pathological T stage | pT1 (ref.)  pT2  pT3/T4  pCR | ---  <0.001  <0.001  0.244 | 1.00  2.57 (1.99 – 3.34)  4.37 (3.22 – 5.94)  1.37 (0.81 – 2.34) | pT1 (ref.)  pT2  pT3/T4  pCR | ---  0.002  0.229  0.504 | 1.00  1.62 (1.19 – 2.20)  1.35 (0.83 – 2.20)  0.68 (0.22 – 2.12) |
| Tumor size | Continue variable | <0.001 | 1.21 (1.16 – 1.25) | Continue variable | 0.068 | 1.06 (0.99 – 1.13) |
| Pathological N stage | pN0 (ref.)  pN1  pN2/N3  pNx  ypN0 | ---  <0.001  <0.001  0.795  0.049 | 1.00  2.01 (1.54 – 2.61)  4.86 (3.75 – 6.29)  1.30 (0.18 – 9.31)  2.28 (1.01 – 5.18) | pN0 (ref.)  pN1  pN2/N3  pNx  ypN0 | ---  <0.001  <0.001  0.790  0.231 | 1.00  1.91 (1.43 – 2.56)  4.10 (2.98 – 5.63)  1.32 (0.18 – 9.76)  1.87 (0.67– 5.21) |
| Histologic grade | I/II (ref.)  III  pCR  Unknown | ---  <0.001  0.650  0.686 | 1.00  1.82 (1.47 – 2.25)  0.89 (0.53-1.48)  0.75 (0.19 – 3.02) | I/II (ref.)  III  pCR  Unknown | ---  0.543  0.651  0.843 | ---  1.08 (0.84 – 1.38)  0.91 (0.63 – 1.88)  1.18 (0.23 – 6.20) |
| Perivascular invasion | No (ref.)  Yes  Unknown | ---  <0.001  0.749 | 1.00  2.23 (1.80 – 2.77)  1.08 (0.69 – 1.68) | No (ref.)  Yes  Unknown | ---  0.007  0.271 | 1.00  1.40 (1.10 – 1.79)  1.69 (0.67 – 4.27) |
| Chemotherapy | No (ref.)  Yes | ---  <0.001 | 1.00  3.12 (2.09 – 4.65) | No (ref.)  Yes | ---  0.782 | 1.00  1.07 (0.68 – 1.68) |

HR (Hazard Ratio); n=1162 censured e n=355 recurrence/contralateral tumor. BCS (Breast Conservative Surgery); OBCS (Oncoplastic Breast Conservative Surgery); TM (Total Mastectomy); IBRM (Immediate Breast Reconstruction after Mastectomy); pCR (pathological complete response). *In situ (biopsy) with invasive tumor in the specimen

Supplementary Table S2. Univariate and multivariable analysis of relevant clinicopathologic characteristics of Breast cancer-specific survival (n=1517)

| **Univariate Multivariate** | | | | | | |
| --- | --- | --- | --- | --- | --- | --- |
| **Variable** | **Categories** | ***p* value** | **CI 95% H.R.** | **Categories** | ***p* value** | **CI 95% H.R.** |
| Clinical stage | In situ*  I (ref.)  IIa-IIb  IIIa-IIIc | 0.102  ---  <0.001  <0.001 | 019 (0.01 – 3.07)  1.00  2.22 (1.54 – 3.20)  5.01 (3.42 – 7.32) | In situ*  I (ref.)  IIa-IIb  IIIa-IIIc | 0.964  ---  0.973  0.023 | 0.15 (0.05 – 2.18)  1.00  1.01 (0.67 – 1.50)  1.74 (1.08 – 2.80) |
| Detection method | Screening (ref.)  Symptoms | ---  <0.001 | 1.00  22.70 (1.86 – 3.92) | Screening (ref.)  Symptoms | ---  0.121 | 1.00  1.37 (0.92 – 2.05) |
| Surgical intervention | BCS (ref.)  OBCS  TM  IBRM | ---  0.111  <0.001  0.191 | 1.00  1.56 (0.90 – 2.70)  2.70 (1.98 – 3.68)  1.31 0.88 – 1.95) | BCS (ref.)  OBCS  TM  IBRM | ---  0.401  0.734  0.281 | 1.00  1.27 (0.73 – 2.23)  0.94 (0.65 – 1.37)  0.79 (0.52 – 1.21) |
| Subtype | Luminal A/B (ref.)  Luminal B/HER2+  Non luminal HER2+  Triple negative | ---  0.193  <0.001  <0.001 | 1.00  1.33 (0.87 – 2.05)  2.43 (1.58 – 3.75)  3.00 (2.22 – 4.07) | Luminal A/B (ref.)  Luminal B/HER2+  Non luminal HER2+  Triple negative | ---  0.296  0.011  <0.001 | 1.00  1.27 (0.81 – 1.97)  1.84 (1.15 – 2.95)  3.71 (2.56 – 5.36) |
| Multifocality | No (ref.)  Yes  Unknown | ---  0.114  0.049 | 1.00  1.32 (0.94 – 1.86)  0.41 (0.17 – 0.99) | No (ref.)  Yes  Unknown | ---  0.141  0.999 | 1.00  1.32 (0.91 – 1.90)  1.00 (0.11 – 8.82) |
| Tumor size | Continue variable | <0.001 | 1.25 (1.20–1.30 | Continue variable | 0.001 | 1.12 (1.04 – 1.20) |
| Pathological N stage | pN0 (ref.)  pN1  pN2/N3  pNx  ypN0 | ---  <0.001  <0.001  0.557  0.582 | 1.00  2.72 (1.91 – 3.87)  6.85 (4.87 – 9.63)  1.28 (0.09–18.43)  1.49 (0.36 – 6.11) | pN0 (ref.)  pN1  pN2/N3  pNx  ypN0 | ---  <0.001  <0.001  0.990  0.611 | 1.00  2.41 (1.64 – 3.55)  5.24 (3.46 – 7.94)  0.19 (0.13 – 12.6)  1.57 (0.28 – 8.77) |
| Histologic grade | I/II (ref.)  III  pCR  Unknown | ---  <0.001  0.234  0.666 | ---  2.38 (1.82 – 3.11)  0.61 (0.27 – 1.38)  1.36 (0.34 – 5.53) | I/II (ref.)  III  pCR  Unknown | ---  0.053  0.235  0.130 | ---  1.36 (0.99 – 1.85)  0.67 (0.28 – 1.48)  4.41 (0.65–29.98) |
| Perivascular invasion | No (ref.)  Yes  Unknown | ---  <0.001  0.588 | 1.00  2.56 (1.95 – 3.37)  0.83 (0.43 – 1.61) | No (ref.)  Yes  Unknown | 1.00  1.36  0.85 | 1.00  1.36 (0.99 – 1.85)  1.37 (0.23 – 3.15) |
| Chemotherapy | No (ref.)  Yes | ---  <0.001 | 1.00  5.53 (2.84–10.78) | No (ref. (  Yes | ---  0.351 | 1.00  1.40 (0.69 – 2.83) |

HR (Hazard Ratio); n=1199 censured and n=318 deaths. BCS (Breast Conservative Surgery); OBCS (Oncoplastic Breast Conservative Surgery); TM (Total Mastectomy); IBRM (Immediate Breast Reconstruction after Mastectomy); pCR (pathological complete response). *In situ (biopsy) with invasive tumor in the specimen.

Supplementary Table S3. Univariate and multivariable analysis of relevant clinicopathologic characteristics of Overall survival (n=1517)

|  | **Univariate** | | | | **Multivariate** | | |
| --- | --- | --- | --- | --- | --- | --- | --- |
| **Variable** | **Categories** | ***p* value** | **CI 95% H.R.** | **Categories** | | ***p* value** | **CI 95% H.R.** |
| Year of surgery | 2012 (ref.)  2013  2014  2015  2016 | ---  0.485  0.127  0.301  0.016 | 1.00  0.90 (0.66 – 1.22)  0.77 (0.55 – 1.08)  0.84 (0.60 – 1.17)  0.63 (0.43 – 0.92) | 2012 (ref.)  2013  2014  2015  2016 | | ---  0.667  0.709  0.689  0.985 | 1.00  0.93 (0.68 – 1.28)  1.07 (0.75 – 1.52)  0.93 (0.66 – 1.32)  0.99 (0.67 – 1.48) |
| Age (yr) | <40  40-69 (ref.)  ≥70 | 0.424  ---  <0.001 | 0.86 (0.59 – 1.25)  1.00  1.85 (1.39 – 2.47) | <40  40-69 (ref.)  ≥70 | | 0.940  ---  <0.001 | 0.98 (0.64 – 1.52)  1.00  1.84 (1.31 – 2.58) |
| Postmenopausal | No  Yes (ref.) | 0.036  --- | 0.78 (0.62 – 0.98)  1.00 | No  Yes (ref.) | | 0.976  --- | 1.00 (0.76 – 1.34)  1.00 |
| Detection method | Screening (ref.)  Symptoms | ---  <0.001 | 1.00  2.13 (1.60 – 2.85) | Screening (ref.)  Symptoms | | ---  0.152 | 1.00  1.26 (0.92 – 1.74) |
| Surgical intervention | BCS (ref.)  OBCS  TM  IBRM | ---  0.176  <0.001  0.402 | 1.00  1.40 (0.86 – 2.26)  2.86 (2.21 – 3.70)  1.16 (0.82 – 1.65) | BCS (ref.)  OBCS  TM  IBRM | | ---  0.356  0.303  0.520 | 1.00  1.27 (0.77 – 2.09)  1.18 (0.86 – 1.61)  0.88 (0.60 – 1.30) |
| Subtype | Luminal A/B (ref.)  Luminal B/HER2+  Non luminal HER2+  Triple negative | ---  0.550  0.003  <0.001 | 1.00  1.12 (0.78 – 1.61)  1.81 (1.23 – 2.65)  2.28 (1.76 – 2.96) | Luminal A/B (ref.)  Luminal B/HER2+  Non luminal HER2+  Triple negative | | ---  0.511  0.067  <0.001 | 1.00  1.14 (0.78 – 1.66)  1.48 (0.97 – 2.24)  2.62 (1.91 – 3.59) |
| Multifocality | No (ref.)  Yes  Unknown | ---  0.100  0.033 | 1.00  1.28 (0.96 – 1.71)  0.47 (0.23 – 0.94) | No (ref.)  Yes  Unknown | | ---  0.109  0.903 | 1.00  1.29 (0.95 – 1.76)  0.91 (0.18 – 4.45) |
| Tumor size | Continue variable | <0.001 | 1.22 (1.18 – 1.27) | Continue variable | | <0.001 | 1.13 (1.06 – 1.21) |
| Pathological N stage | pN0 (ref.)  pN1  pN2/N3  pNx  ypN0 | ---  <0.001  <0.001  0.432  0.637 | 1.00  2.34 (1.77 – 3.10)  4.85 (3.67 – 6.41)  0.75 (0.05 – 10.78)  1.32 (0.42 – 4.17) | pN0 (ref.)  pN1  pN2/N3  pNx  ypN0 | | ---  <0.001  <0.001  0.971  0.568 | 1.00  2.21 (1.62 – 3.02)  3.91 (2.77 – 5.50)  0.79 (0.08 – 11.82)  1.50 (0.38 – 5.95) |
| Histologic grade | I/II (ref.)  III  pCR  Unknown | ---  <0.001  0.206  0.885 | 1.00  2.03 (1.62 – 2.85)  0.66 (0.35 – 1.26)  0.90 (0.22 – 3.64) | I/II (ref.)  III  pCR  Unknown | | ---  0.007  0.207  0.203 | 1.00  1.44 (1.11 – 1.86)  0.76 (0.38 – 1.27)  3.05 (0.55 – 17.00) |
| Perivascular invasion | No (ref.)  Yes  Unknown | ---  <0.001  0.328 | 1.00  1.97 (1.57 – 2.46)  0.77 (0.45 – 1.31) | No (ref.)  Yes  Unknown | | ---  0.505  0.502 | 1.00  1.09 (0.84 – 1.42)  0.70 (0.25 – 1.96) |
| Chemotherapy | No (ref.)  Yes | ---  0.003 | 1.00  1.67 (1.19 – 2.34) | No (ref.)  Yes | | ---  0.107 | 1.00  0.71 (0.47 – 1.08) |

HR (Hazard Ratio); n=1292 censured e n=225 deaths. BCS (Breast Conservative Surgery); OBCS (Oncoplastic Breast Conservative Surgery); TM (Total Mastectomy); IBRM (Immediate Breast Reconstruction after Mastectomy); pCR (pathological complete response). *In situ (biopsy) with invasive tumor in the specimen.
